# Supplementary material
Source: PubMed Central journal article supplement (PMC5113100)
Supplement: mt2016122x1.pdf [file mt2016122x1.pdf]

## Supplementary Material

**Figure S1 – The effect of pOVA dose during prophylactic anti-OVA immunization on the anti-tumour activity.** C57BL/6 mice were immunized in a regimen of one prime and 2 boosts at a 2-week interval with the antigenic OVA plasmid combined or not with pGag. Two weeks after the last vaccination, they were challenged with B16F10-OVA cells and tumour growth and mice survival were followed for 90 days. No significant differences were seen between 1 µg pOVA and 10 µg pOVA DNA vaccine treatments.

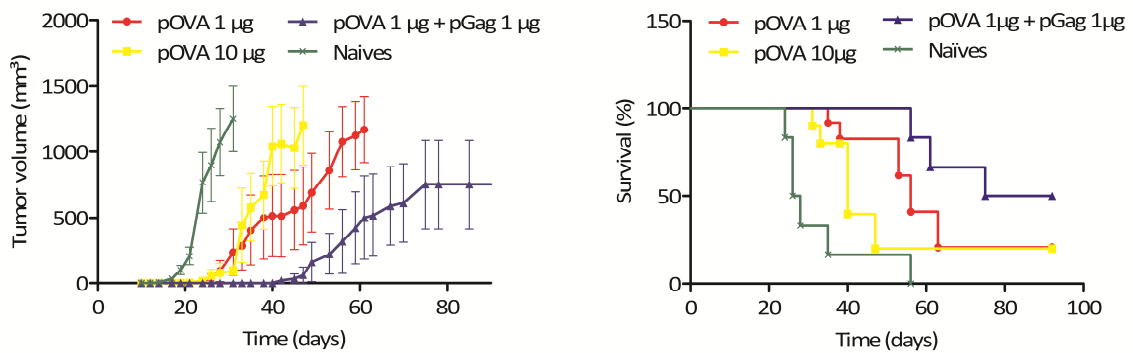

## Supplementary Materials and Methods

### HIV-1 Gag (5'→3')

```
ATGGGAGCTAGAGCCTCTGTGCTGTCTGGCGCAAGCTGGACAGATGGGAGAAGATCAGACTGAGGCCAGG
CGGCAAGAAGAAGTACAAGCTGAAGCACATCGTGTGGGCCAGCAGAGAGCTGGAAAGATTCGCCGTGAACC
CCGGCCTGCTGGAAACCAGCGAGGGCTGCAGACAGATCCTGGGCCAGCTGCAGCCTTCTCTGCAGACCGGCA
GCGAGGAAAGAAGATCCCTGTACAACACCGTGGCCACCCTGTACTGCGTGCACCAGAGAATCGAGATCAAGG
ACACCAAAGAGGCCCTGGACAAGATCGAGGAAGAACAAGTCTAAGAAGAAGGCCAGCAGGCTGCC
GCCGACACAGGCCATTCTTCTCAGGTGTCCAGAACTACCCCATCGTGCAGAACATCCAGGGCCAGATGGTGC
ATCAGGCCATCAGCCCCAGAACCCTGAACGCCTGGGTCAAGGTGGTGAAGAGAAGGCCCTTTCAGCCCCGAA
TGATCCCCATGTTTCAGCGCCCTGTCTGAGGGCGCCACACCCAGGACCTGAACACCATGCTGAACACAGTGGG
CGGCCACCAGGCCGCCATGCAGATGCTGAAAGAGACAATCAACGAAGAGGCCGCCGAGTGGGACAGAGTGC
ACCCTGTGCATGCTGGCCCTATCGCCCTGGCCAGATGAGAGAGCCTAGAGGCTCTGATATCGCCGGCACCAC
CAGCACCTGCAGGAACAGATCGGCTGGATGACCCACAACCCCCCATCCCTGTGGGCGAGATCTACAAGAGA
TGGATCATCCTGGGACTGAACAAGATCGTGCGGATGTACAGCCCTACCAGCATCCTGGACATCAGGCAGGGCC
CCAAAGAGCCCTTCAGAGACTACGTGGACAGATTCTACAAGACCCTGAGAGCCGAGCAGGCCAGCCAGGAAG
TGAAGAAGTGGATGACAGAGACTGCTGGTGCAGAACGCCAACCCGACTGCAAGACCATCCTGAAGGCTC
TGGGCCCTGGCGCCACCCTGGAAGAGATGATGACAGCCTGTCAGGGCGTGGGCGGACCTGGCCATAAGGCTA
GAGTGTGGCCGAGGCCATGAGCCAAGTGACCAACCCTGCCACCATCATGATCCAGAAGGGCAACTTCCGGA
ACCAGAGAAAGACCGTGAAGTGCTTCAACTGCGGCAAAGAGGGCCATATCGCCAAGAACTGCAGAGCCCCCA
GAAAGAAAGGCTGCTGGAAGTGTGGAAAAGAGGGGACCAGATGAAGGACTGCACCGAGAGACAGGCCAA
CTTCTGGGCAAGATCTGGCCTAGCCACAAGGGCAGACCCGGCAACTTTCTGCAGAGCAGACCCGAGCCTACC
GCCCTCCTGAGGAAAGCTTCAGATTCGGCGAGGAAACCACCCCCAGCCAGAAGCAGGAACCCATCGAC
AAAGAGCTGTACCCTCTGGCCAGCCTGAGAAGCCTGTTTCGGCAGCGACCCTAGCAGCCAG
```

Human gp100

5'ATGGACCTGGTGTGAAGAGATGCCTGCTGCACCTGGCCGTGATCGGCGCTCTGCTGGCTGTGGGAGCTAC  
CAAGGTGCCAGAAACCAGGACTGGCTGGGCGTGTCCAGACAGCTGAGAACAAAGGCCTGGAACAGGCAGC  
TGTACCCCCGAGTGGACAGAGGCCAGAGACTGGACTGTTGGAGAGGGCGGACAGGTGTCCCTGAAGGTGTCCA  
ACGACGGCCCTACCCTGATCGGAGCCAACGCCAGCTTCTCTATCGCCCTGAACTTCCCCGGCAGCCAGAAGGT  
GCTGCTGACGGACAAGTGATCTGGGTCAACAACACCATCATCAACGGCTCCCAAGTGTTGGGCGGACAGCC  
AGTGTATCCTCAGGAAACCGACGACGCCTGCATCTTCCCTGATGGCGGCCCTTGTCTAGCGGCAGCTGGTCCC  
AGAAAAGATCCTTCGTGTACGTGTGGAAAACCTGGGGACAGTACTGGCAGGTGCTGGGCGGACCTGTGTCTG  
GCCTGTCTATCGGCACAGGCAGAGCCATGCTGGGCACCCACACCATGGAAGTGACCGTGTACCACAGAAGAG  
GCAGCAGATCCTACGTGCCCTGGCCACTCTAGCAGCGCCTTACCATCATGGACCAGGTGCCCTCAGCGTG  
TCCGTGTCCCAGCTGAGAGCACTGGACGGCGGCAACAAGCACTTCTGAGAAACCAGCCCCTGACATTCGCC  
TGCAGCTGCACGACCTAGCGGCTATCTGGCCGAGGCCGACCTGAGCTACACATGGGACTTCGGCGACAGCA  
GCGGCACCCTGATCTAGAGCCCTGGTCTGACCCACACCTACCTGGAACCTGGCCCTGTGACAGCCAGGT  
GGTGCTGCAGGCTGCCATCCCTCTGACAAGCTGTGGCAGCAGCCCTGTGCCTGGCACAACAGACGGCCACAG  
ACCTACAGCCGAGGCCCTAACACAACCGCTGGACAGGTGCCAACACCGAGGTCGTGGGCACAACACCAGG  
CCAGGCTCCTACAGCTGAGCCAAGCGGCACAACCAGCGTGCAGGTGCCACAACCGAAGTGATCAGCACCGC  
CCCTGTGCAGATGCCTACCGCCGAGAGCACAGGCATGACCCCTGAAAAGGTGCCCGTGTCTGAAGTGATGGG  
CACCACCCTGGCCGAGATGAGCACACCTGAGGCCACCGGCATGACACCAGCCGAGGTGTCAATCGTGGTGCT  
GAGCGGAACAACAGCCGCCAAGTGACCACCACCGAGTGGGTGAAAACACCGCCAGAGAGCTGCCCATCCC  
TGAGCCTGAGGGCCCTGACGCCAGCAGCATCATGAGCACCGAGAGCATCACAGGCAGCCTGGGCCCTCTGCT  
GGATGGCACAGCTACCCTGAGACTCGTGAAGCGCCAGGTGCCACTGGACTGCGTGCTGTACAGATACGGCAG  
CTTCTCCGTGACCCTGGACATCGTGCAGGGCATCGAGTCCGCCGAGATTCTGCAGGCAGTGCCTAGCGGAGAG  
GGCGACGTTTTGAGCTGACCGTGTCTTGTGAGGGCGGCCTGCCTAAAGAGGCCTGCATGAAAATCAGCAGCC  
CCGGCTGTCAGCCCCCTGCTCAGAGACTGTGTCAGCCCGTGCCTAGCCCTGCCTGTCAGCTGGTGTGCAT  
CAGATCCTGAAGGGCGGCTCCGGCACCTACTGCCTGAATGTGTCTCTGGCCGACACCAACAGTCTGGCCGTGG  
TGTCTACCCAGCTGATCATGCCCGGCCAGGAAGCTGGACTGGGACAGGTGCCACTGATCGTGGGCATCCTGCT  
GGTGCTGATGGCTGTGGTGCTGGCCTCCCTGATCTACAGGCGGAGACTGATGAAGCAGGACTTCTCTGTGCC  
CAGCTGCCTCACAGCAGCAGCCACTGGCTGAGACTGCCAGAATCTTCTGCTCCTGCCCCATCGGCGAGAACA  
GCCCACTGCTGTCTGGCCAGCAAGTCTGA

Ovalbumin

ATGGGATCTATCGGCGCTGCCAGCATGGAATTCTGCTTCGACGTGTTCAAAGAAGTGAAGGTGCACCACGCCA  
ACGAGAACATCTTCTACTGCCCTATCGCCATCATGAGCGCCCTGGCCATGGTGTACTTGGGCGCCAAGGACAG  
CACCAGAACCCAGATCAACAAGGTGGTGCATTGACAAGCTGCCCGGCTTCGGCGACTCTATCGAGGCCAG  
TGTGGCACCAGCGTGAACGTGCACAGCAGCCTGAGAGACATCCTGAACCAGATCACCAAGCCCAACGACGTG  
TACAGCTTCAGCCTGGCCAGCAGACTGTACGCCGAGGAAAGATACCCCATCCTGCCCGAGTACCTGCAGTGG  
TGAAAGAGCTGTACAGAGGCGGCCTGGAACCCATCAACTTCCAGACAGCCGCCGACCAGGCCAGAGAGCTGA  
TCAACAGCTGGGTGGAAAGCCAGACCAACGGCATCATCAGAAACGTGCTGCAGCCCAGCAGCGTGGACTCCC  
AGACAGCTATGGTGTCTGTAACGCCATCGTGTCAAGGGCCTGTGGGAAAAGACCTTCAAGGACGAGGACA  
CCCAGGCCATGCCCTTCAGAGTGACCGAGCAGGAATCCAAGCCCGTGCAGATGATGTACCAGATCGGCCTGTT  
CAGAGTGGCCTCCATGGCCTCCGAGAAGATGAAGATCCTGGAAGTGCCTTTCGCCAGCGGCACCATGAGCATG  
CTGGTGCTGCTGCCTGATGAGGTGTCCGGACTGGAACAGCTGGAATCCATCATCAACTTTGAGAAGCTGACCG  
AGTGGACCAGCAGCAACGTGATGGAAGAACGGAAGTCAAAGTGTACCTGCCCCGGATGAAGATGGAAGAG  
AAGTACAACCTGACCAGCGTGCTGATGGCTATGGGCATCACCGATGTGTTTCAGCAGCAGCGCCAACCTGAGCG

GCATCAGCTCTGCCGAGAGCCTGAAGATCAGCCAGGCCGTGCACGCTGCCACGCCGAGATCAATGAGGCCG  
GCAGAGAAGTCGTGGGATCTGCCGAAGCTGGCGTGGACGCCGCTTCCGTGTCCGAGGAATTCAGAGCCGACC  
ACCCCTTCTGTTCTGCATCAAGCACATTGCCACCAACGCCGTGCTGTTCTTTGGCAGATGCGTGTCCCCCTGA
